# Supplementary material
Source: MDPI journal article supplement (https://www.mdpi.com/2073-4441/14/22/3723)
Supplement: s1 [file s1]

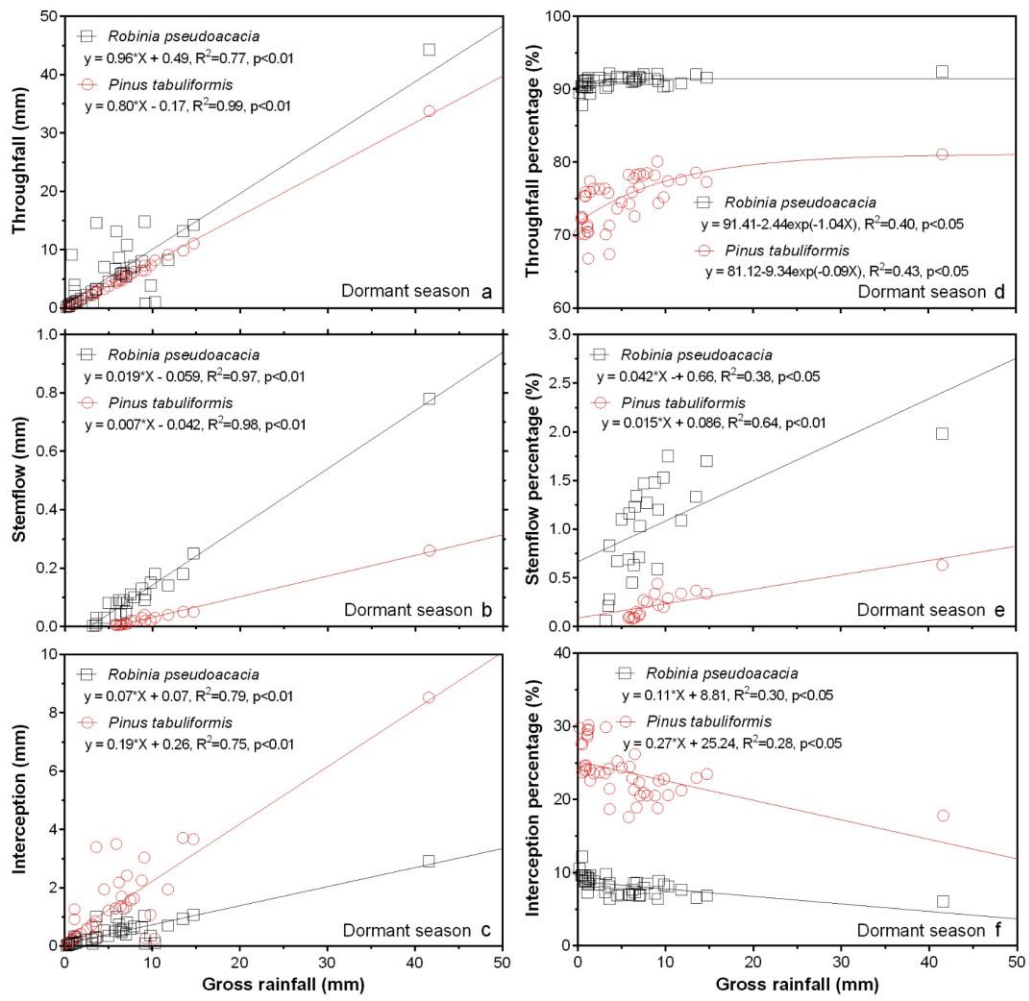

Figure S1. Relationships between individual rainfall amount and rainfall partitioning components for *R. pseudoacacia* (a, b, c) and *P. tabuliformis* (d, e, f) during the dormant season in 2015 and 2016.

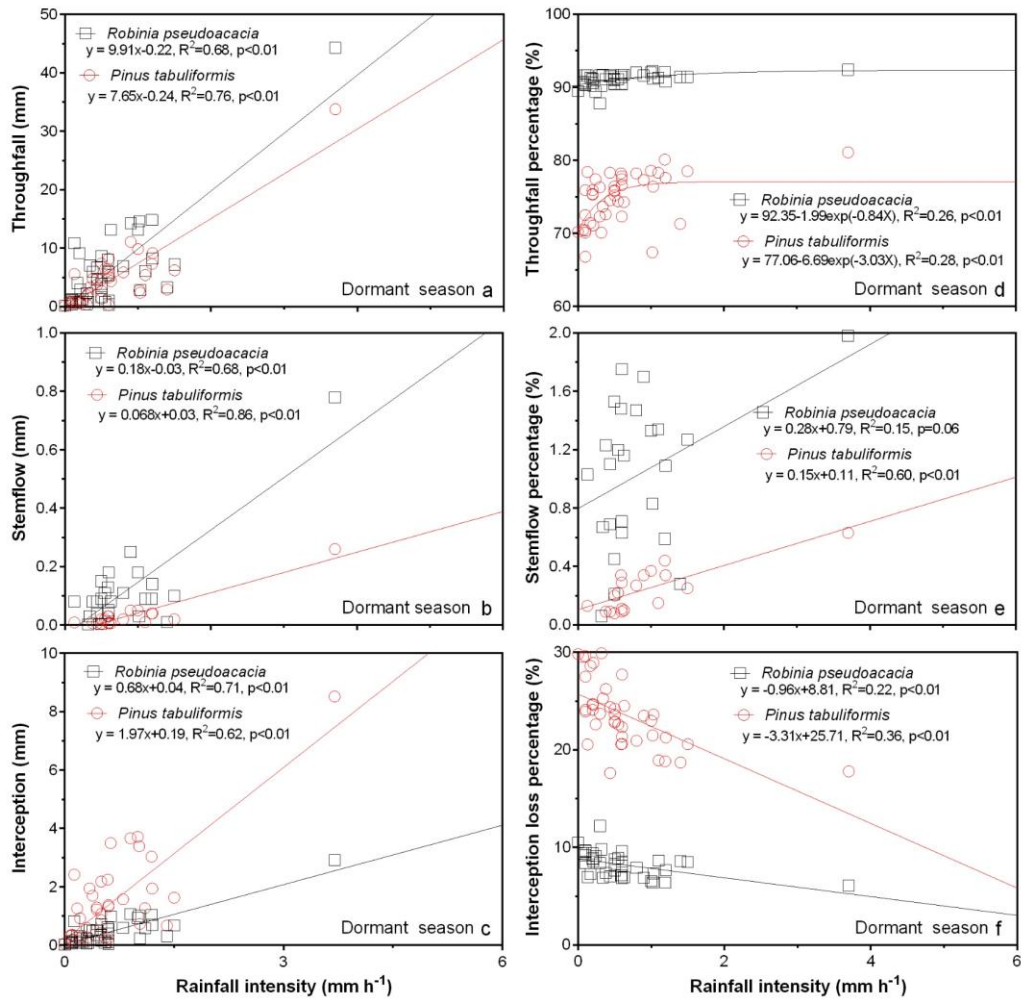

**Figure S2.** Relationships between individual rainfall intensity and rainfall partitioning components for *R. pseudoacacia* (a, b, c) and *P. tabuliformis* (d, e, f) during the dormant season in 2015 and 2016.

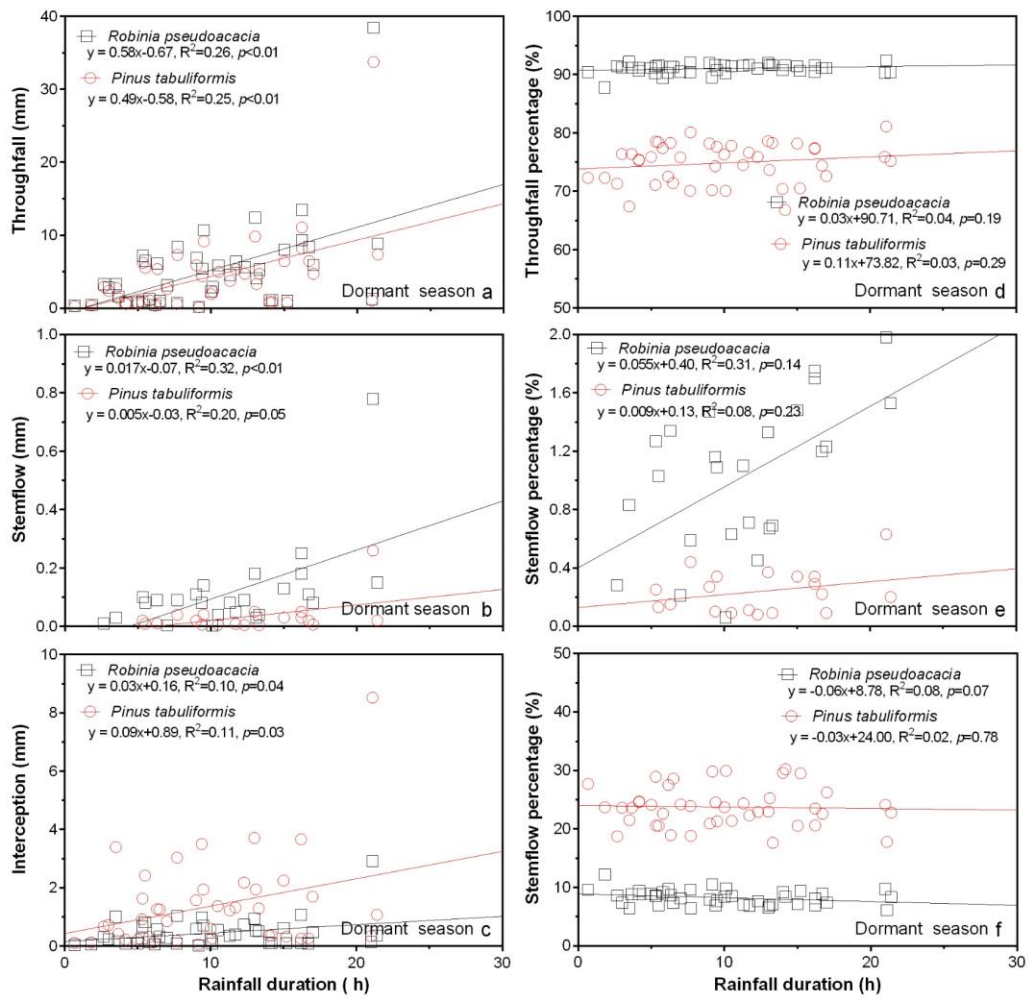

Figure S3. Relationships between individual rainfall duration and rainfall partitioning components for *R. pseudoacacia* (a, b, c) and *P. tabuliformis* (d, e, f) during the dormant season in 2015 and 2016.
